1 **Variance heterogeneity genome-wide mapping for cadmium in bread wheat reveals novel**  
2 **genomic loci and epistatic interactions**

3 Waseem Hussain <sup>\*a</sup>, Malachy Campbell<sup>b</sup>, Diego Jarquin<sup>a</sup>, Harkamal Walia<sup>a</sup>, and Gota Morota <sup>\*b</sup>

4 <sup>a</sup>Department of Agronomy and Horticulture, University of Nebraska-Lincoln, Lincoln, NE 68583

5 <sup>b</sup>Department of Animal and Poultry Sciences, Virginia Polytechnic Institute and State  
6 University, Blacksburg, VA 24061

7  
8 **Corresponding author**

9 \*Waseem Hussain

10 Department of Agronomy and Horticulture

11 University of Nebraska-Lincoln

12 Lincoln, Nebraska 68583 USA.

13 E-mail: [waseem.hussain@unl.edu](mailto:waseem.hussain@unl.edu)

14 Current address: International Rice Research Institute, Los Banos, Philippines

15 \*Gota Morota

16 Department of Animal and Poultry Sciences

17 Virginia Polytechnic Institute and State University

18 175 West Campus Drive

19 Blacksburg, Virginia 24061 USA.

20 E-mail: [morota@vt.edu](mailto:morota@vt.edu)

21

22 Running title: vGWAS for wheat grain cadmium

23 **Core Ideas:**

24 Variance-heterogeneity mapping for grain Cadmium (Cd) concentration in bread wheat was  
25 performed.

26 Novel variance-heterogeneity loci were detected on chromosomes 2A and 2B.

27 Loci influencing both mean and variance were identified on chromosome 5A.

28 Identified variance-heterogeneity loci were associated with epistatic interactions.

29 Homoeology within the vQTL on chromosomes 2A and 2B was found.

30 **Abbreviations**

31 ABC transporter, ATP-binding cassette transporter; Cd, cadmium; DGLM, double generalized  
32 linear model; GLM, generalized linear model; GRM, genomic relationship matrix; HGLM,  
33 Hierarchical generalized linear model; HWW, hard-red winter wheat; mQTL, mean quantitative  
34 trait loci; mvQTL, mean-variance quantitative trait loci; QTL, quantitative trait loci; ROS,  
35 reactive oxygen species; SNP, single nucleotide polymorphism; vQTL, variance heterogeneity  
36 quantitative trait loci; variance vGWAS heterogeneity genome-wide association studies.

37

38 **Abstract**

39 Genome-wide association mapping identifies quantitative trait loci (QTL) that influence the  
40 mean differences between the marker genotypes for a given trait. While most loci influence the  
41 mean value of a trait, certain loci, known as variance heterogeneity QTL (vQTL) determine the  
42 variability of the trait instead of the mean trait value (mQTL). In the present study, we performed  
43 a variance heterogeneity genome-wide association study (vGWAS) for grain cadmium (Cd)  
44 concentration in bread wheat. We used double generalized linear model and hierarchical  
45 generalized linear model to identify vQTL associated with grain Cd. We identified novel vQTL  
46 regions on chromosomes 2A and 2B that contribute to the Cd variation and loci that affect both  
47 mean and variance heterogeneity (mvQTL) on chromosome 5A. In addition, our results  
48 demonstrated the presence of epistatic interactions between vQTL and mvQTL, which could  
49 explain variance heterogeneity. Overall, we provide novel insights into the genetic architecture  
50 of grain Cd concentration and report the first application of vGWAS in wheat. Moreover, our  
51 findings indicated that epistasis is an important mechanism underlying natural variation for grain  
52 Cd concentration.

53 Genome-wide association studies (GWAS) are routinely conducted to study the genetic basis of  
54 important traits in crops. GWAS link phenotypic variation with dense genetic marker data using  
55 a linear modeling framework (e.g., Nordborg and Weigel, 2008; Ingvarsson and Street, 2011;  
56 Huang and Han, 2014; Xiao et al., 2017). Standard GWAS approaches seek to identify marker-  
57 trait associations that influence the mean phenotypic values. However, differences in the  
58 variance between genotypes are also under genetic control (Shen et al., 2012). As a result,  
59 several recent studies have identified loci associated with differences in variance between  
60 genotypes (Cao et al., 2014; Corty et al., 2018). Such genetic variants that affect the variance

61 heterogeneity of traits have been referred to as variance heterogeneity quantitative trait loci  
62 (vQTL) (Rönnegård and Valdar, 2011). vQTL can be detected by searching the difference in the  
63 variability between the groups of genotypes that carry alternative alleles at a particular locus  
64 (Forsberg and Carlborg, 2017). A simple example is genotypes of wheat with difference in plant  
65 height. One genotype group is homozygous for a certain allele and manifests greater variability  
66 (including both shorter and taller plants), while the second genotype group that is homozygous  
67 for the alternative allele involves plants that are similar or uniform in height. This contrast in  
68 plant height across two allelic groups leads to genetic variance heterogeneity. Note that the mean  
69 difference between the two groups does not have to be different for variance heterogeneity to  
70 arise (Fig. 1).

71 Variance heterogeneity-based genome-wide association studies (vGWAS) have emerged as a  
72 new approach for identifying and mapping vQTL. vQTL contribute to variability, which is  
73 undetected through standard statistical mapping (bi-parental or association) procedures  
74 (Rönnegård and Valdar, 2011; Shen et al., 2012; Forsberg and Carlborg, 2017). It has been  
75 argued that variance heterogeneity between genotypes can be partially explained by epistasis or  
76 gene-by-environment interactions (Brown et al., 2014; Forsberg and Carlborg, 2017; Young et  
77 al., 2018). Thus, vQTL can provide insights into epistasis or phenotypic plasticity (Nelson et al.,  
78 2013; Young et al., 2018). Moreover, these vGWAS frameworks can serve as tractable  
79 approaches to reduce the search space when assessing epistasis among markers (Brown et al.,  
80 2014; Wei et al., 2016). This is because we can limit the number of interacting marker pairs  $\binom{m}{2}$   
81 to be investigated into  $\binom{k}{2}$ , where  $k$  is the number of markers ( $k < m$ ) associated with vQTL or  
82 mvQTL.

83 Numerous studies have reported vQTL associated with diverse phenotypes, including the  
84 tendency to left-right turning and bristles (Mackay and Lyman, 2005) and locomotor handedness  
85 (Ayroles et al., 2015) in *Drosophila*; coat color (Nachman et al., 2003), circadian activity, and  
86 exploratory behavior (Corty et al., 2018) in mice; thermotolerance (Queitsch et al., 2002),  
87 flowering time (Salomé et al., 2011), and molybdenum concentration (Shen et al., 2012;  
88 Forsberg et al., 2015) in *Arabidopsis*; litter size in swine (Sell-Kubiak et al., 2015); urinary  
89 calcium excretion in rats (Perry et al., 2012); and body mass index (Yang et al., 2012; Young et  
90 al., 2018), sero-negative rheumatoid arthritis (Wei et al., 2017), and serum urate (Topless et al.,  
91 2015) in humans. In plants, vGWAS have been limited to few species, including *Arabidopsis*  
92 (Shen et al., 2012; Forsberg et al., 2015) and maize (Kusmec et al., 2017).

93 Methodologically, vQTL have been detected by performing statistical tests searching for unequal  
94 variance for a quantitative trait between the marker genotypes (Rönnegård and Valdar, 2012).  
95 The most common statistical tests used to identify vQTL include Levene's test (Paré et al.,  
96 2010), Brown-Forsythe test (Brown and Forsythe, 1974), squared residual value linear modeling  
97 (Struchalin et al., 2012), and correlation least squares test (Brown et al., 2014). However, these  
98 methods have certain drawbacks when applied to genetic data. For example, Levene's and  
99 Brown-Forsythe tests are sensitive to deviations from normality of residuals and have an inherent  
100 inability to model continuous covariates (Rönnegård and Valdar, 2011; Dumitrascu et al., 2019).

101 Double generalized linear model (DGLM) has emerged as an alternative approach to model the  
102 variance heterogeneity for genetic studies (Rönnegård and Valdar, 2011). In DGLM, sample  
103 means and residuals are modelled jointly. Here, generalized linear models (GLM) are fit by  
104 including only the fixed effects in the linear predictor(s) for the mean and then the squared  
105 residuals are used to estimate the dispersion effects. It is important to correct for population

106 structure, which can otherwise lead to spurious associations in GWAS (Patterson et al., 2006). In  
107 DGLM, population structure can be corrected by incorporating the first few principal  
108 components of a genomic relationship matrix (GRM) (Patterson et al., 2006; Price et al., 2010)  
109 as fixed covariates in the model. However, the first few principal components may not be  
110 sufficient to account for complex population structure or family relatedness (Hoffman, 2013; Sul  
111 et al., 2018). Alternatively, we can fit linear mixed models (LMM) to explicitly correct for  
112 population structure, where the whole GRM can be included to account for relationships among  
113 individuals and correct for background genotype effects. Hierarchical generalized linear model  
114 (HGLM) has been proposed as an extension of the DGLM to model random effects in the mean  
115 component (Rönnegård and Valdar, 2012; Tan et al., 2014). In HGLM, the GRM can be used to  
116 model correlated random effects and account for population structure.

117 We applied a vGWAS framework to examine the genetic architecture of grain cadmium (Cd)  
118 accumulation in wheat. Cd is a heavy metal that is highly toxic to human health (Menke et al.,  
119 2009). Identifying genetic variants that control low-grain Cd concentration in wheat is necessary  
120 to understand the basis for phenotypic variation in grain Cd and can help accelerate the  
121 development of low Cd wheat varieties. A recent study assessed natural variation in bread wheat  
122 grain Cd by conducting GWAS (Guttieri et al., 2015a). However, only a fraction of phenotypic  
123 variation could be explained by the top marker associations, indicating that grain Cd  
124 concentration is a complex trait that is influenced by multiple loci and/or loci with non-additive  
125 effects (Guttieri et al., 2015a). Given the genetic complexity of Cd in wheat, we hypothesized  
126 that variation in grain Cd concentration in wheat is influenced by vQTL that are likely to be  
127 involved in epistatic interactions; this would allow us to capture additional variation that is not  
128 accounted for in a standard GWAS approach.

129 In this study, we sought to provide additional insights into natural variation in grain Cd  
130 concentration by extending the standard GWAS to vGWAS using a hard winter wheat  
131 association mapping panel. To achieve this, we used DGLM and HGLM to perform vGWAS.  
132 Previously, Guttieri et al., (2015a) conducted the standard GWAS using this association panel  
133 and identified a single mean effect QTL (mQTL) for grain Cd concentration on chromosome 5A.  
134 In addition, we aimed to understand the basis of vQTL by searching for pairwise epistatic  
135 interactions among vQTL and mQTL. To our knowledge, the present study is the first to conduct  
136 vGWAS and identify vQTL associated with grain Cd concentration in wheat.

137

## 138 MATERIALS AND METHODS

### 139 Plant Materials and Genotyping

140 We analyzed a publicly available dataset comprising of phenotypes for grain mineral  
141 concentration for  $n = 299$  genotyped hard-red winter wheat accessions (hereafter called as  
142 HWW association panel). The details of the study are discussed in Guttieri et al., (2015a; 2015b),  
143 and access to the data is available at <http://triticeaetoolbox.org/wheat/>. The data are also  
144 downloadable at <https://github.com/whussain2/vGWAS/tree/master/Data>. Here, we focused on  
145 grain Cd concentration (mg/kg) collected across two years (2012 and 2013) in one location  
146 (Oklahoma, USA). Briefly, the experiment was laid in an augmented incomplete block design  
147 with two replications and 15 blocks within each replication. Least square means adjusted across  
148 the replications and blocks in each year were obtained for each genotype. In this study, we  
149 averaged the least square means for each genotype across two years because of non-significant  
150 genotype x year interaction (Guttieri et al., 2015a). The association panel was genotyped using a  
151 90K iSelect Infinium array (Wang et al., 2014b). We used a filtered marker data set consisting of  
152  $m = 14,731$  single nucleotide polymorphism (SNP) markers from the 90K iSelect Infinium  
153 array as described by Guttieri et al., (2015a). All the SNP markers were physically anchored on  
154 the new reference genome of hexaploid wheat RefSeq v1.0 (International Wheat Genome  
155 Sequencing Consortium (IWGSC), 2018).

### 156 Statistical Modeling

### 157 Genome-Wide Association Mapping



158 Standard GWAS or mQTL analysis based on mean differences between marker genotypes for  
159 grain Cd concentration was performed similar to Guttieri et al., (2015a) using the rrBLUP  
160 package (Endelman, 2011) in the R environment (R Core Team 2018).

### 161 **Variance-Heterogeneity Genome-Wide Association Mapping**

162 We used DGLM and HGLM to perform vGWAS and detect vQTL in the current study. The  
163 description of models used is given below.

#### 164 **DGLM**

165 DGLM is a parametric approach that can be used to jointly model the mean and dispersion using  
166 a GLM framework (Smyth, 1989). The DGLM works iteratively by first fitting a linear model to  
167 estimate the mean effects (mQTL). The squared residuals are used to estimate the dispersion  
168 effects (vQTL) using GLM with a gamma-distributed response and the log link function. This  
169 process is cycled until convergence. Here, we extended the DGLM to marker-based association  
170 analysis according to Rönnegård and Valdar (2011). The mean part of DGLM was as follows:

$$y = \mathbf{1}\mu_m + \mathbf{X}\boldsymbol{\beta} + \mathbf{s}_j a_{mj} + \boldsymbol{\epsilon} \quad \#(1)$$

171 where  $\mathbf{y}$  is the Cd concentration (mg/kg);  $\mathbf{1}$  is the column vector of 1;  $\mu_m$  is the intercept;  $\mathbf{X}$  is  
172  $n \times 4$  covariate matrix of the top four principle components (PCs) obtained by performing  
173 principal component analysis (PCA) of marker data using the SNPRelate R package (Zheng et  
174 al., 2012);  $\boldsymbol{\beta}$  is the regression coefficients for the covariates;  $\mathbf{s}_j \in (0,2)$  is the vector containing the  
175 number of reference allele at the marker  $j$ ,  $a_{mj}$  is the effect size or allele substitution effect of the  
176  $j$ th marker; and  $\boldsymbol{\epsilon}$  is the residual. We assumed

$$\epsilon_i \sim N(0, \mathbf{I}\sigma_{\epsilon_i}^2)$$

$$\log(\sigma_{\epsilon_i}^2) = \mathbf{1}\mu_v + \mathbf{s}_j a_{vj}$$

177 where  $\mathbf{I}$  is the identity matrix;  $\sigma_{\epsilon_i}^2$  is the residual variance; and  $\mathbf{1}\mu_v$  and  $a_v$  are the intercept and  
178 marker regression coefficients for the variance part of the model, respectively. While we fit  
179 separate effects for the mean using a standard linear model and for the variance using the squared  
180 residuals in gamma distributed GLM with a log link function, this is equivalent to modeling  
181  $\mathbf{y} \sim N(\mathbf{1}\mu + \mathbf{X}\boldsymbol{\beta} + \mathbf{s}a_{mj}, \exp(\mathbf{1}\mu_v + \mathbf{s}_j a_{vj}))$  or  $\boldsymbol{\epsilon} \sim N(0, \exp(\mathbf{1}\mu_v + \mathbf{s}_j a_{vj}))$  in equation (1).

182 The DGLM was fitted using the dglm package ([https://cran.r-](https://cran.r-project.org/web/packages/dglm/index.html)  
183 [project.org/web/packages/dglm/index.html](https://cran.r-project.org/web/packages/dglm/index.html)) in R. SNP markers were fitted one by one, and for  
184 each marker, the effect sizes, standard errors, and p-values were obtained for the mean and  
185 dispersion components. To account for multiple testing, we determined the effective number of  
186 independent tests ( $M_{\text{eff}}$ ) using the method described by Li and Ji (2005). Subsequently, a  
187 genome-wide significance threshold level ( $P < 1.44 \times 10^{-5}$ ) was determined using the  
188 following formula:

$$\alpha_p = 1 - (1 - \alpha_e)^{\frac{1}{M_{\text{eff}}}} \quad (2)$$

189 where  $\alpha_p$  is the genome-wide significance threshold level,  $\alpha_e$  is the desired level of significance  
190 (0.05), and  $M_{\text{eff}} = 3,495$ .

## 191 HGLM

192 To explicitly account for population structure and kinship in GWAS, LMM have been proposed  
193 as alternative methods that allow the genetic relationships between individuals to be modeled as  
194 random effects. To perform vGWAS in the LMM framework and to identify genome-wide  
195 vQTL, we used a HGLM approach. HGLM (Lee and Nelder, 1996) is a class of GLM and is a

196 direct extension of the DGLM that allows joint modelling of the mean and dispersion parts and  
197 introduces random effects as a linear predictor for the mean (Rönnegård and Carlborg, 2007).  
198 The mean part of HGLM was given as follows:

$$\mathbf{y} = \mathbf{1}\mu + \mathbf{s}_j a_{mj} + \mathbf{Z}\mathbf{u} + \boldsymbol{\epsilon} \#(3)$$

199 assuming that

$$\mathbf{u} \sim N(0, \mathbf{G}\sigma_u^2)$$

200 where  $\mathbf{Z}$  is the incident matrix of random effects of genotypes;  $\mathbf{u}$  is the vector of random effects  
201 with  $\text{Var}(\mathbf{u}) = \mathbf{G}\sigma_u^2$ ;  $\mathbf{G}$  is the GRM of VanRaden (2008); and  $\sigma_u^2$  is the additive genetic variance.  
202 A log link function was used for the residual variance given by  $\exp(\mathbf{s}_j a_{vj})$ , which is equivalent  
203 to modeling  $\mathbf{y}|a_{mj}, \mathbf{u}, a_{vj} \sim N(\mathbf{s}_j a_{mj} + \mathbf{Z}\mathbf{u}, \exp(\mathbf{s}_j a_{vj}))$ .

204 We fitted HGLM using the hglm R package (Rönnegård et al., 2010b). We reformulated the term  
205  $\mathbf{Z}\mathbf{u}$  as  $\mathbf{Z}^*\mathbf{u}^*$ , where  $\mathbf{u}^* \sim N(0, \mathbf{I}\sigma_u^2)$ ;  $\mathbf{Z}^* = \mathbf{Z}_0\mathbf{L}$ ;  $\mathbf{L}$  is the Cholesky factorization of the  $\mathbf{G}$  matrix;  
206 and  $\mathbf{Z}_0$  is the identity matrix (Rönnegård et al., 2010a). Markers treated as fixed effects were fit  
207 one by one, and for each marker, the effect sizes, standard errors, and p-values were obtained for  
208 the mean and dispersion components. The genome-wide significance threshold level was derived  
209 as described in the DGLM analysis. Circular Manhattan and quantile-quantile (QQ) plots were  
210 created using the CMplot R package (<https://github.com/YinLiLin/R-CMplot>).

## 211 **Epistasis Analysis**

212 We investigated the extent of epistasis that was manifested through variance heterogeneity. All  
213 the possible pairwise interaction analyses for markers that were associated with grain Cd  
214 concentration were performed using the following two markers at a time epistatic model:

$$\mathbf{y} = \mathbf{1}\mu + \mathbf{X}\boldsymbol{\beta} + \mathbf{s}_j a_j + \mathbf{s}_k a_k + (\mathbf{s}_j \mathbf{s}_k) v_{jk} + \boldsymbol{\epsilon} \quad \#(4)$$

215 where  $\mathbf{y}$  is the vector of Cd concentration (mg/kg);  $\mathbf{X}$  is the incident matrix for the first four PCs;  
216  $\boldsymbol{\beta}$  is the regression coefficients for the PCs;  $\mathbf{s}_j$  and  $\mathbf{s}_k$  are SNP codes for the  $j$ th and  $k$ th markers,  
217 respectively;  $a_j$  and  $a_k$  are the additive effects of the markers  $j$  and  $k$ , respectively; and  $v_{jk}$  is  
218 the additive  $\times$  additive epistatic effect of the  $j$ th and  $k$ th markers. We used Bonferroni correction  
219 to account for the multiple testing. The threshold of  $-\log_{10}(0.05/325) = -\log_{10}(1.54 \times 10^{-4}) =$   
220 3.8 was used to declare the significance of interaction effects.

## 221 **Homoeology and Candidate Gene Analysis**

222 Homoeologous gene construction was performed as per procedure described by  
223 (Santantonio et al., 2019). Briefly, the annotated coding sequences within the 2A vQTL  
224 were aligned back onto themselves using the IWGSC RefSeq v.1.0 coupled with BLAST tool  
225 in Ensemble Plants browser (Bolser et al., 2017). For candidate gene identification for the SNP  
226 markers associated with variance heterogeneity, we used Ensembl Plants browser to retrieve the  
227 candidate genes and functional annotations  
228 ([http://plants.ensembl.org/Triticum\\_aestivum/Info/Index](http://plants.ensembl.org/Triticum_aestivum/Info/Index)) and the wheat RefSeq v1.0 annotations  
229 (International Wheat Genome Sequencing Consortium (IWGSC) et al., 2018) available at  
230 <https://wheat-urgi.versailles.inra.fr/Seq-Repository/Annotations>. For candidate gene analysis, we  
231 first determined the positions of significant SNP markers, and the interval was defined as the  
232 distance between the lowest and highest markers based on the position of SNP. For example, if  
233 the position of the lowest SNP and highest SNP was 715,333,165 bp and 717,146,211 bp in the  
234 vQTL region on chromosome 2A, we defined 2A as the 715,333,165-717,146,211 interval for  
235 candidate gene identification. After defining the interval for the 2A (2A: 715,333,165-

236 717,146,211) and 2B (2B: 691,780,716- 701,097,263 bp) regions, we explored the intervals  
237 using Ensembl Plants browser and extracted the Gene IDs within these intervals. The Gene IDs  
238 within the defined interval on chromosomes 2A and 2B were analyzed using the IWGSC RefSeq  
239 v.1.0 (International Wheat Genome Sequencing Consortium (IWGSC) et al., 2018) integrated  
240 genome annotations to obtain the predicted genes and functional annotations.

241

## 242 **RESULTS**

### 243 **Variance Heterogeneity GWAS Provide Additional Insights into Natural Variation in** 244 **Grain Cd**

245 Although grain Cd concentration is a highly heritable trait, recent GWAS revealed that  
246 significant loci can only explain a fraction of the variation for this trait (Guttieri et al., 2015a).  
247 We found the single genomic region on chromosome 5A affecting the grain Cd concentration  
248 (Fig. 2) from the standard GWAS analysis confirming the results of Guttieri et al., (2015). The  
249 DGLM and HGLM approaches were used to detect vQTL while controlling for population  
250 structure. The population structure based on PCA of the HWW association panel is given in  
251 Supplemental File S1: Figure S1. QQ plots (Supplemental File S1: Figure S2) show that both  
252 DGLM and HGLM had adequate control of population structure and effective control of false  
253 positives.

254 We classified the QTL into the following categories: mQTL, which contributes to difference in  
255 the means between marker genotypes; vQTL, which influences the variability between the  
256 genotypes; and mean-variance QTL (mvQTL), which contributes to differences in both the mean  
257 and variance between the genotypes.

258 Based on the DGLM, we identified two vQTL associated with the variance heterogeneity of Cd  
259 concentration. One vQTL on 2A contained four SNP markers, and one vQTL on 2B contained  
260 17 SNP markers (Fig. 2 and Supplemental File S1: Table S1). The four SNP markers associated  
261 with the vQTL region on the chromosome 2A region spanned the physical distance of 1.81 Mb;  
262 all SNP markers were located within the 1,000 bp linkage disequilibrium (LD) block  
263 (Supplemental File S1: Figure S3). The vQTL region on 2B associated with 17 SNP markers

264 spanned the physical distance of 9.32 Mb, and the SNP markers were located within four LD  
265 blocks of sizes 0, 1, 1, and 204 kb (Supplemental File S1: Figure S4).

266 In addition, we identified a single mvQTL (containing four SNP markers) associated with both  
267 mean and variance heterogeneity on chromosome 5A (Fig. 2 and Table S2). The markers  
268 associated with mvQTL on chromosome 5A were identical to those obtained in the original  
269 GWAS analysis according to Guttieri et al., (2015), indicating that this region affects both the  
270 mean and the variance heterogeneity (Supplemental File S1: Figure S5). Moreover, these results  
271 showed that DGLM serves as an accurate framework to jointly detect mean and variance QTL  
272 and provides additional insights into phenotypic variation that would otherwise not be captured  
273 by standard GWAS.

274 The HGLM analysis revealed the same results as those obtained using DGLM and showed  
275 identical vQTL on chromosomes 2A and 2B and mvQTL on chromosome 5A associated with  
276 variance heterogeneity of Cd concentration (Fig. 2 and Supplemental File S1: Table S1). Further,  
277 we observed a potential vQTL region on 2D from the DGLM and HGLM analyses. This region  
278 was slightly below the significance threshold level but may have an implication on Cd variation  
279 given that the allopolyploid nature of wheat and the role of homoeologous gene sets on  
280 phenotypic variation (Borrill et al., 2019).

### 281 **Variance Heterogeneity Loci can be Partially Explained by Epistasis**

282 We investigated all significant markers (25 markers) associated with mvQTL on chromosome  
283 5A and vQTL on chromosomes 2A and 2B and explored all possible pairwise additive  $\times$  additive  
284 epistatic interactions. We detected significant additive  $\times$  additive interactions between the  
285 markers (Fig. 3). The interaction was more evident between mvQTL on chromosome 5A and

286 vQTL on chromosomes 2A and 2B. Specifically, all the markers associated with the 5A mvQTL  
287 region revealed highly significant interactions with all the markers associated with the 2A and  
288 2B vQTL regions. Interactions between vQTL on chromosomes 2A and 2B were also observed;  
289 however, the interactions were less evident, and only a few markers within these regions showed  
290 statistically significant interactions. Taken together, these results suggested that the vQTL and  
291 mvQTL may be manifested because of pairwise epistatic interactions.

## 292 **Homoeology and Candidate Genes**

293 Homoeology analysis between the defined regions on chromosomes 2A and 2B resulted in 22  
294 homoeologous gene sets, consisting of 21 triplicates and only one duplicate gene set. Additional  
295 details on the homoeologous gene sets can be found in Supplemental File S2. As compared to  
296 the total number of candidate genes equal to 39 within the 1.18 Mb 2A region, 22 (58%) were  
297 homoeologous across the three genomes. Based on the annotations for the 22 homoeologous  
298 gene sets, a few of the genes encoded homeobox-leucine zipper family protein, plant peroxidase,  
299 and glycosyltransferase, which have been associated with the genetic regulation of minerals in  
300 plants (Whitt et al., 2018). For example, homeodomain-leucine zipper family protein has been  
301 functionally associated with Cd tolerance by regulating the expression of metal transporters  
302 *OsHMA2* and *OsHMA3* in rice (Ding et al., 2018; Yu et al., 2019). These genes have been found  
303 to play important roles in loading Cd onto the xylem and root-to-shoot translocation of Cd in  
304 rice. In plants, response to heavy metals involves the accumulation of reactive oxygen species  
305 (ROS) that damage DNA and cellular machinery (Kumari et al., 2008; Rascio and Navari-Izzo,  
306 2011). In *Arabidopsis*, the peroxidase genes *At2g35380*, *PER20*, and *At2g18150* have been found  
307 to be associated with Cd responses by affecting the lignin biosynthesis in root cells under high  
308 Cd stress (Chen and Kao, 1995; van de Mortel et al., 2008). Full list of candidate genes within



309 the 2A and 2B region, and within the homoeologous gene sets is in Supplemental File S2. These  
310 results clearly indicate that most of the genes with vQTL regions are redundant across the  
311 genomes and may have significant role in the genetic regulation of grain Cd concentration in  
312 wheat. However, we contend that further investigation of these regions using dense markers and  
313 increased sample size is necessary to fine-map the QTL and validate potential candidate genes  
314 underlying these loci and also the role of gene redundancy in generating phenotypic variation.

315

## 316 **DISCUSSION**

317 In the present study, we explored the genetic variants affecting variance heterogeneity of Cd.  
318 Given the complexity of genetic regulation of Cd in wheat (Guttieri et al., 2015a) and the  
319 influence of epistatic interactions, we anticipated that partial genetic regulation of Cd in wheat  
320 can be detected using methods that have been developed to identify vQTL. As reported by  
321 Rönnegård and Valdar, (2012), a potential explanation for variance-controlling QTL is epistatic  
322 interactions that are unspecified in the model. Herein, we utilized two approaches, namely,  
323 DGLM and HGLM, to detect vQTL and mvQTL associated with grain Cd concentration in  
324 wheat.

325 The DGLM framework is a powerful approach for vGWAS analysis. However, in DGLM, GLM  
326 is fit by including only the fixed effects in the linear predictor of mean and dispersion. Therefore,  
327 by using the DGLM approach, population structure can only be accounted for by using the first  
328 few PCs obtained from the SNP matrix; however, this may not completely account for complex  
329 population structure and family relationships (Price et al., 2010). We hypothesized that the use of  
330 random effects to model the mean component can better account for population structure and  
331 reduce spurious associations. In this approach, a random additive genetic effect is introduced to  
332 the mean component of the model that accounts for population structure and cryptic relatedness  
333 between accessions. Therefore, we performed vGWAS analysis using HGLM. Interestingly, both  
334 DGLM and HGLM approaches were effective in identifying the genetic variants controlling  
335 variability of Cd, suggesting that the loci detected with the DGLM approach are likely to be true  
336 QTL rather than artifacts from population structure. The impact of population structure on the  
337 power of DGLM and HGLM remains to be explored; further examination is warranted.

338 In the literature, it has been argued that variance heterogeneity can also arise by a simple mean  
339 variance relationship, which does not have biological significance (Young et al., 2018). To rule  
340 out the role of the mean-variance function in generating variance heterogeneity, we plotted the  
341 estimated effects of the top three significant associated vQTL markers at the alternate genotypes  
342 and observed that the means of all the markers were the same (Fig. 4), indicating that the effect  
343 of SNP on variance heterogeneity was not due to the consequences of mean-variance function  
344 but likely due to the genetic effects (Yang et al., 2012).

345 Further, variance heterogeneity can also be observed in a population when two or more alleles  
346 having different effects on the phenotype are in high LD (Cao et al., 2014; Wang et al., 2014a;  
347 Forsberg and Carlborg, 2017). To rule out the possibility of LD as a source for variance  
348 heterogeneity in grain Cd in this population, we suggest the use of high-density markers and  
349 larger sample size to identify the actual functional alleles associated with Cd, their LD patterns,  
350 and their effects on the Cd phenotype (Struchalin et al., 2010; Forsberg and Carlborg, 2017).

351 In QTL studies, variance heterogeneity arises because of various underlying mechanisms, such  
352 as epistatic interactions (Struchalin et al., 2010; Shen et al., 2012; Nelson et al., 2013). Epistasis  
353 gives rise to variance heterogeneity when the different allele combinations at one locus change  
354 the effect of the other loci in the genome, as shown in one pair of interacting markers (Fig. 5).  
355 Hence, identifying the loci affecting variance heterogeneity through vGWAS means that the loci  
356 are likely to be involved in epistatic interactions. To validate this assumption and investigate  
357 whether epistasis can explain the identified vQTL and mvQTL in this study, we analyzed all  
358 possible pairwise interactions between the associated markers. We detected significant epistatic  
359 interactions between the associated markers (Fig. 2), which can explain the existence of variance  
360 heterogeneity in the genotypes. Additionally, identifying vQTL through vGWAS serves as an

361 effective way to restrict the search space when detecting epistatic QTL. Thus, with the vGWAS  
362 approach, many of the requirements necessary for conventional epistasis mapping can be  
363 avoided (e.g., large sample size and extensive multiple testing corrections that reduce power).  
364 However, Forsberg and Carlborg (2017) empirically showed that the presence of variance  
365 heterogeneity does not always guarantee the presence of epistatic interactions that contribute to  
366 the total variation of the trait; therefore, the results should be interpreted carefully when multi-  
367 locus interactions are involved.

368 The genomic regions on chromosomes 2A and 2B associated with variance heterogeneity  
369 revealed homoeologous gene sets with 58% genes revealing the gene redundancy mostly present  
370 as three functional homoeologous copies (triplicated). This also indicates that genetic complexity  
371 of Cd phenotype is not only controlled by multiple genes but may be affected by the multiple  
372 homoeologs of the individual genes which warrants further investigation. Presence of multiple  
373 copies of homoeologous genes may have consequence on phenotypic variation due to dosage  
374 effects and or functional redundancy (Borrill et al., 2019). Dosage effect, in which the  
375 phenotypic variation is amplified by the addition of each gene copies can act additively (e.g.,  
376 genes controlling grain protein content (Avni et al., 2014) and grain size (Wang et al., 2018)) or  
377 non-additively (e.g., genes controlling amylopectin content in wheat (Kim et al., 2003)). Non-  
378 additive variation between homoeologous gene has been shown to be an important source of  
379 variation in wheat. However, its relative contribution across the wheat genome as compared to  
380 non-syntenic regions was proportionately less (Santantonio et al., 2019). This is in agreement  
381 with our results because we observed interactions among the homoeologous genomic regions on  
382 chromosomes 2A and 2B. However, this homoeologous gene interactions was less evident as  
383 compared to two-way interactions found between non-syntenic vQTL regions on 2A and 2B with

384 the mvQTL region on 5A. The nature and functional role of homoeologous gene sets within the  
385 vQTL region on 2A and 2B is not clear. However, it is increasingly feasible in wheat to examine  
386 the effects of gene redundancy and explore the contribution of homoeologous genes in  
387 generating phenotypic variation (Wang et al., 2018) .

## 388 **Conclusion**

389 We showed the potential of vGWAS for dissecting the genetic architecture of complex traits and  
390 identifying novel genomic regions influencing variance heterogeneity in wheat. We provided  
391 evidence that the vQTL contribute to natural variation in grain Cd concentration through non-  
392 additive genetic effects. This is particularly evidenced by epistatic interactions between mvQTL  
393 on chromosome 5A and vQTL on chromosomes 2A and 2B.

## 394 **Acknowledgements**

395 This work was supported by the National Science Foundation under Grant Number 1736192 to  
396 H.W. and G.M. Data analysis was performed using the Holland Computing Center  
397 computational resources at the University of Nebraska-Lincoln.

398

399

## 400 **Supplemental Materials**

401 Supplemental File S1 contains Table S1 and Figures S1-S5.

402 Table S1: Single nucleotide polymorphism markers associated with variance heterogeneity of  
403 cadmium concentration in the hard-red winter wheat association panel.

404 Table S2: Single nucleotide polymorphism markers associated with the mean of cadmium  
405 concentration in the hard-red winter wheat association panel.

406 Figure S1: Principal component analysis of the population structure in the hard-red winter wheat  
407 association panel. The different colors represent the sub-populations of red wheat and winter  
408 wheat.

409 Figure S2: Quantile-quantile (QQ) plot of the outputs for the double generalized linear model  
410 and the hierarchical generalized linear model shown in the Manhattan plot.

411 Figure S3: Linkage disequilibrium block and annotated genes on chromosome 2A.

412 Figure S4: Linkage disequilibrium blocks and annotated genes on chromosome 2B.

413 Figure S5: Violin plot showing the differences in the mean and variance of Cadmium  
414 concentration with alternative marker allele groups.

415 Supplemental File S2: A list of candidate genes and homoeologous gene sets associated with the  
416 vQTL on chromosomes 2A and 2B.

## 417 **Data Availability**

418 The wheat phenotypic and genotypic data can be downloaded from  
419 (<http://triticeaetoolbox.org/wheat/>) and also available on the GitHub repository

420 <https://github.com/whussain2/vGWAS>. The R code used for the analysis is available on the  
421 GitHub repository <https://github.com/whussain2/vGWAS>.

#### 422 **Conflict of interest**

423 The authors declare there are no competing interests.

#### 424 **Author's Contributions**

425 W.H. and G.M. conceived the study. W.H. performed the data analysis and drafted the  
426 manuscript. D.J. helped the data analysis. M.C., D.J., H.W., and G.M. revised the manuscript.

427 G.M. supervised and directed the study. All authors read and approved the manuscript.

428

429

430 **References**

- 431 Avni, R., R. Zhao, S. Pearce, Y. Jun, C. Uauy, F. Tabbita, T. Fahima, A. Slade, J. Dubcovsky,  
432 and A. Distelfeld. 2014. Functional characterization of GPC-1 genes in hexaploid wheat.  
433 *Planta* 239:313–324. doi:10.1007/s00425-013-1977-y
- 434 Ayroles, J.F., S.M. Buchanan, C. O’Leary, K. Skutt-Kakaria, J.K. Grenier, A.G. Clark, D.L.  
435 Hartl, and B.L. de Bivort. 2015. Behavioral idiosyncrasy reveals genetic control of  
436 phenotypic variability. *PNAS* 112:6706–6711. doi:10.1073/pnas.1503830112
- 437 Bolser, D.M., D.M. Staines, E. Perry, and P.J. Kersey. 2017. *Ensembl Plants: Integrating Tools*  
438 *for Visualizing, Mining, and Analyzing Plant Genomic Data*. A.D.J. van Dijk, ed.  
439 Springer New York, New York, NY.
- 440 Borrill, P., S.A. Harrington, and C. Uauy. 2019. Applying the latest advances in genomics and  
441 phenomics for trait discovery in polyploid wheat. *The Plant Journal* 97:56–72.  
442 doi:10.1111/tpj.14150
- 443 Brown, A.A., A. Buil, A. Viñuela, T. Lappalainen, H.-F. Zheng, J.B. Richards, K.S. Small, T.D.  
444 Spector, E.T. Dermitzakis, and R. Durbin. 2014. Genetic interactions affecting human  
445 gene expression identified by variance association mapping. *eLife* 3:e01381.  
446 doi:10.7554/eLife.01381
- 447 Brown, M.B., and A.B. Forsythe. 1974. The Small Sample Behavior of Some Statistics Which  
448 Test the Equality of Several Means. *Technometrics* 16:129–132. doi:10.2307/1267501



- 449 Cao, Y., P. Wei, M. Bailey, J.S.K. Kauwe, and T.J. Maxwell. 2014. A Versatile Omnibus Test  
450 for Detecting Mean and Variance Heterogeneity. *Genet Epidemiol* 38:51–59
- 451 Chen, S.L., and C.H. Kao. 1995. Cd induced changes in proline level and peroxidase activity in  
452 roots of rice seedlings. *Plant Growth Regul* 17:67–71. doi:10.1007/BF00024497
- 453 Corty, R.W., V. Kumar, L.M. Tarantino, J.S. Takahashi, and W. Valdar. 2018. Mean-Variance  
454 QTL Mapping Identifies Novel QTL for Circadian Activity and Exploratory Behavior in  
455 Mice. *G3: Genes, Genomes, Genetics* g3.200194.2018. doi:10.1534/g3.118.200194
- 456 Ding, Y., S. Gong, Y. Wang, F. Wang, H. Bao, J. Sun, C. Cai, K. Yi, Z. Chen, and C. Zhu. 2018.  
457 MicroRNA166 Modulates Cadmium Tolerance and Accumulation in Rice. *Plant Physiol.*  
458 177:1691–1703. doi:10.1104/pp.18.00485
- 459 Dumitrascu, B., G. Darnell, J. Ayroles, and B.E. Engelhardt. 2019. Statistical tests for detecting  
460 variance effects in quantitative trait studies. *Bioinformatics* 35:200–210.  
461 doi:10.1093/bioinformatics/bty565
- 462 Endelman, J.B. 2011. Ridge Regression and Other Kernels for Genomic Selection with R  
463 Package rrBLUP. *The Plant Genome* 4:250–255. doi:10.3835/plantgenome2011.08.0024
- 464 Forsberg, S.K.G., M.E. Andreatta, X.-Y. Huang, J. Danku, D.E. Salt, and Ö. Carlborg. 2015. The  
465 Multi-allelic Genetic Architecture of a Variance-Heterogeneity Locus for Molybdenum  
466 Concentration in Leaves Acts as a Source of Unexplained Additive Genetic Variance.  
467 *PLOS Genetics* 11:e1005648. doi:10.1371/journal.pgen.1005648

- 468 Forsberg, S.K.G., and Ö. Carlborg. 2017. On the relationship between epistasis and genetic  
469 variance heterogeneity. *J Exp Bot* 68:5431–5438. doi:10.1093/jxb/erx283
- 470 Guttieri, M.J., P.S. Baenziger, K. Frels, B. Carver, B. Arnall, S. Wang, E. Akhunov, and B.M.  
471 Waters. 2015a. Prospects for Selecting Wheat with Increased Zinc and Decreased  
472 Cadmium Concentration in Grain. *Crop Science* 55:1712–1728.  
473 doi:10.2135/cropsci2014.08.0559
- 474 Guttieri, M.J., P.S. Baenziger, K. Frels, B. Carver, B. Arnall, and B.M. Waters. 2015b. Variation  
475 for Grain Mineral Concentration in a Diversity Panel of Current and Historical Great  
476 Plains Hard Winter Wheat Germplasm. *Crop Science* 55:1035–1052.  
477 doi:10.2135/cropsci2014.07.0506
- 478 Hoffman, G.E. 2013. Correcting for Population Structure and Kinship Using the Linear Mixed  
479 Model: Theory and Extensions. *PLOS ONE* 8:e75707. doi:10.1371/journal.pone.0075707
- 480 Huang, X., and B. Han. 2014. Natural Variations and Genome-Wide Association Studies in Crop  
481 Plants. *Annual Review of Plant Biology* 65:531–551. doi:10.1146/annurev-arplant-  
482 050213-035715
- 483 Hulse, A.M., and J.J. Cai. 2013. Genetic Variants Contribute to Gene Expression Variability in  
484 Humans. *Genetics* 193:95–108. doi:10.1534/genetics.112.146779
- 485 Ingvarsson, P.K., and N.R. Street. 2011. Association genetics of complex traits in plants. *New*  
486 *Phytologist* 189:909–922. doi:10.1111/j.1469-8137.2010.03593.x

487 International Wheat Genome Sequencing Consortium (IWGSC), IWGSC RefSeq principal  
488 investigators:, R. Appels, K. Eversole, C. Feuillet, B. Keller, J. Rogers, N. Stein, IWGSC  
489 whole-genome assembly principal investigators:, C.J. Pozniak, N. Stein, F. Choulet, A.  
490 Distelfeld, K. Eversole, J. Poland, J. Rogers, G. Ronen, A.G. Sharpe, Whole-genome  
491 sequencing and assembly:, C. Pozniak, G. Ronen, N. Stein, O. Barad, K. Baruch, F.  
492 Choulet, G. Keeble-Gagnère, M. Mascher, A.G. Sharpe, G. Ben-Zvi, A.-A. Josselin, Hi-C  
493 data-based scaffolding:, N. Stein, M. Mascher, A. Himmelbach, Whole-genome assembly  
494 quality control and analyses:, F. Choulet, G. Keeble-Gagnère, M. Mascher, J. Rogers, F.  
495 Balfourier, J. Gutierrez-Gonzalez, M. Hayden, A.-A. Josselin, C. Koh, G. Muehlbauer,  
496 R.K. Pasam, E. Paux, C.J. Pozniak, P. Rigault, A.G. Sharpe, J. Tibbits, V. Tiwari,  
497 Pseudomolecule assembly:, F. Choulet, G. Keeble-Gagnère, M. Mascher, A.-A. Josselin,  
498 J. Rogers, RefSeq genome structure and gene analyses:, M. Spannagl, F. Choulet, D.  
499 Lang, H. Gundlach, G. Haberer, G. Keeble-Gagnère, K.F.X. Mayer, D. Ormanbekova, E.  
500 Paux, V. Prade, H. Šimková, T. Wicker, Automated annotation:, F. Choulet, M.  
501 Spannagl, D. Swarbreck, H. Rimbart, M. Felder, N. Guilhot, H. Gundlach, G. Haberer, G.  
502 Kaithakottil, J. Keilwagen, D. Lang, P. Leroy, T. Lux, K.F.X. Mayer, S. Twardziok, L.  
503 Venturini, Manual gene curation:, R. Appels, H. Rimbart, F. Choulet, A. Juhász, G.  
504 Keeble-Gagnère, Subgenome comparative analyses:, F. Choulet, M. Spannagl, D. Lang,  
505 M. Abrouk, G. Haberer, G. Keeble-Gagnère, K.F.X. Mayer, T. Wicker, Transposable  
506 elements:, F. Choulet, T. Wicker, H. Gundlach, D. Lang, M. Spannagl, Phylogenomic  
507 analyses:, D. Lang, M. Spannagl, R. Appels, I. Fischer, Transcriptome analyses and  
508 RNA-seq data:, C. Uauy, P. Borrill, R.H. Ramirez-Gonzalez, R. Appels, D. Arnaud, S.  
509 Chalabi, B. Chalhoub, F. Choulet, A. Cory, R. Datla, M.W. Davey, M. Hayden, J. Jacobs,

510 D. Lang, S.J. Robinson, M. Spannagl, B. Steuernagel, J. Tibbits, V. Tiwari, F. van Ex,  
511 B.B.H. Wulff, Whole-genome methylome:, C.J. Pozniak, S.J. Robinson, A.G. Sharpe, A.  
512 Cory, Histone mark analyses:, M. Benhamed, E. Paux, A. Bendahmane, L. Concia, D.  
513 Latrasse, BAC chromosome MTP IWGSC–Bayer Whole-Genome Profiling (WGP) tags:.,  
514 J. Rogers, J. Jacobs, M. Alaux, R. Appels, J. Bartoš, A. Bellec, H. Berges, J. Doležel, C.  
515 Feuillet, Z. Frenkel, B. Gill, A. Korol, T. Letellier, O.-A. Olsen, H. Šimková, K. Singh,  
516 M. Valárik, E. van der Vossen, S. Vautrin, S. Weining, Chromosome LTC mapping and  
517 physical mapping quality control:, A. Korol, Z. Frenkel, T. Fahima, V. Glikson, D. Raats,  
518 J. Rogers, RH mapping:, V. Tiwari, B. Gill, E. Paux, J. Poland, Optical mapping:, J.  
519 Doležel, J. Číhalíková, H. Šimková, H. Toegelová, J. Vrána, Recombination analyses:, P.  
520 Sourdille, B. Darrier, Gene family analyses:, R. Appels, M. Spannagl, D. Lang, I.  
521 Fischer, D. Ormanbekova, V. Prade, CBF gene family:, D. Barabaschi, L. Cattivelli,  
522 Dehydrin gene family:, P. Hernandez, S. Galvez, H. Budak, NLR gene family:, B.  
523 Steuernagel, J.D.G. Jones, K. Witek, B.B.H. Wulff, G. Yu, PPR gene family:, I. Small, J.  
524 Melonek, R. Zhou, Prolamin gene family:, A. Juhász, T. Belova, R. Appels, O.-A. Olsen,  
525 WAK gene family:, K. Kanyuka, R. King, Stem solidness (SSt1) QTL team:, K. Nilsen,  
526 S. Walkowiak, C.J. Pozniak, R. Cuthbert, R. Datla, R. Knox, K. Wiebe, D. Xiang,  
527 Flowering locus C (FLC) gene team:, A. Rohde, T. Golds, Genome size analysis:, J.  
528 Doležel, J. Čížková, J. Tibbits, MicroRNA and tRNA annotation:, H. Budak, B.A.  
529 Akpinar, S. Biyiklioglu, Genetic maps and mapping:, G. Muehlbauer, J. Poland, L. Gao,  
530 J. Gutierrez-Gonzalez, A. N’Daiye, BAC libraries and chromosome sorting:, J. Doležel,  
531 H. Šimková, J. Číhalíková, M. Kubaláková, J. Šafář, J. Vrána, BAC pooling, BAC library  
532 repository, and access:, H. Berges, A. Bellec, S. Vautrin, IWGSC sequence and data

533 repository and access:, M. Alaux, F. Alfama, A.-F. Adam-Blondon, R. Flores, C.  
534 Guerche, T. Letellier, M. Loaec, H. Quesneville, Physical maps and BAC-based  
535 sequences:, 1A BAC sequencing and assembly:, C.J. Pozniak, A.G. Sharpe, S.  
536 Walkowiak, H. Budak, J. Condie, J. Ens, C. Koh, R. Maclachlan, Y. Tan, T. Wicker, 1B  
537 BAC sequencing and assembly:, F. Choulet, E. Paux, A. Alberti, J.-M. Aury, F.  
538 Balfourier, V. Barbe, A. Couloux, C. Cruaud, K. Labadie, S. Mangenot, P. Wincker, 1D,  
539 4D, and 6D physical mapping:, B. Gill, G. Kaur, M. Luo, S. Sehgal, 2AL physical  
540 mapping:, K. Singh, P. Chhuneja, O.P. Gupta, S. Jindal, P. Kaur, P. Malik, P. Sharma, B.  
541 Yadav, 2AS physical mapping:, N.K. Singh, J. Khurana, C. Chaudhary, P. Khurana, V.  
542 Kumar, A. Mahato, S. Mathur, A. Sevanthi, N. Sharma, R.S. Tomar, 2B, 2D, 4B, 5BL,  
543 and 5DL IWGSC–Bayer Whole-Genome Profiling (WGP) physical maps:, J. Rogers, J.  
544 Jacobs, M. Alaux, A. Bellec, H. Berges, J. Doležel, C. Feuillet, Z. Frenkel, B. Gill, A.  
545 Korol, E. van der Vossen, S. Vautrin, 3AL physical mapping:, B. Gill, G. Kaur, M. Luo,  
546 S. Sehgal, 3DS physical mapping and BAC sequencing and assembly:, J. Bartoš, K.  
547 Holušová, O. Plíhal, 3DL BAC sequencing and assembly:, M.D. Clark, D. Heavens, G.  
548 Kettleborough, J. Wright, 4A physical mapping, BAC sequencing, assembly, and  
549 annotation:, M. Valárik, M. Abrouk, B. Balcárková, K. Holušová, Y. Hu, M. Luo, 5BS  
550 BAC sequencing and assembly:, E. Salina, N. Ravin, K. Skryabin, A. Beletsky, V.  
551 Kadnikov, A. Mardanov, M. Nesterov, A. Rakitin, E. Sergeeva, 6B BAC sequencing and  
552 assembly:, H. Handa, H. Kanamori, S. Katagiri, F. Kobayashi, S. Nasuda, T. Tanaka, J.  
553 Wu, 7A physical mapping and BAC sequencing:, R. Appels, M. Hayden, G. Keeble-  
554 Gagnère, P. Rigault, J. Tibbits, 7B physical mapping, BAC sequencing, and assembly:,  
555 O.-A. Olsen, T. Belova, F. Cattonaro, M. Jiumeng, K. Kugler, K.F.X. Mayer, M. Pfeifer,

- 556 S. Sandve, X. Xun, B. Zhan, 7DS BAC sequencing and assembly:, H. Šimková, M.  
557 Abrouk, J. Batley, P.E. Bayer, D. Edwards, S. Hayashi, H. Toegelová, Z. Tulpová, P.  
558 Visendi, 7DL physical mapping and BAC sequencing:, S. Weining, L. Cui, X. Du, K.  
559 Feng, X. Nie, W. Tong, L. Wang, Figures:, P. Borrill, H. Gundlach, S. Galvez, G.  
560 Kaithakottil, D. Lang, T. Lux, M. Mascher, D. Ormanbekova, V. Prade, R.H. Ramirez-  
561 Gonzalez, M. Spannagl, N. Stein, C. Uauy, L. Venturini, Manuscript writing team:, N.  
562 Stein, R. Appels, K. Eversole, J. Rogers, P. Borrill, L. Cattivelli, F. Choulet, P.  
563 Hernandez, K. Kanyuka, D. Lang, M. Mascher, K. Nilsen, E. Paux, C.J. Pozniak, R.H.  
564 Ramirez-Gonzalez, H. Šimková, I. Small, M. Spannagl, D. Swarbreck, and C. Uauy.  
565 2018. Shifting the limits in wheat research and breeding using a fully annotated reference  
566 genome. *Science* 361. doi:10.1126/science.aar7191
- 567 Kim, W., J.W. Johnson, R.A. Graybosch, and C.S. Gaines. 2003. Physicochemical Properties  
568 and End-use Quality of Wheat Starch as a Function of Waxy Protein Alleles. *Journal of*  
569 *Cereal Science* 37:195–204. doi:10.1006/jcrs.2002.0494
- 570 Kumari, M., G.J. Taylor, and M.K. Deyholos. 2008. Transcriptomic responses to aluminum  
571 stress in roots of *Arabidopsis thaliana*. *Mol Genet Genomics* 279:339.  
572 doi:10.1007/s00438-007-0316-z
- 573 Kusmec, A., S. Srinivasan, D. Nettleton, and P.S. Schnable. 2017. Distinct genetic architectures  
574 for phenotype means and plasticities in *Zea mays*. *Nature Plants* 3:715–723.  
575 doi:10.1038/s41477-017-0007-7
- 576 Lee, Y., and J.A. Nelder. 1996. Hierarchical Generalized Linear Models. *Journal of the Royal*  
577 *Statistical Society. Series B (Methodological)* 58:619–678

- 578 Li, J., and L. Ji. 2005. Adjusting multiple testing in multilocus analyses using the eigenvalues of  
579 a correlation matrix. *Heredity (Edinb)* 95:221–227. doi:10.1038/sj.hdy.6800717
- 580 Mackay, T.F.C., and R.F. Lyman. 2005. *Drosophila* bristles and the nature of quantitative genetic  
581 variation. *Philos Trans R Soc Lond B Biol Sci* 360:1513–1527.  
582 doi:10.1098/rstb.2005.1672
- 583 Menke, A., P. Muntner, E.K. Silbergeld, E.A. Platz, and E. Guallar. 2009. Cadmium levels in  
584 urine and mortality among U.S. adults. *Environ. Health Perspect.* 117:190–196.  
585 doi:10.1289/ehp.11236
- 586 van de Mortel, J.E., H. Schat, P.D. Moerland, E. Ver Loren van Themaat, S. van der Ent, H.  
587 Blankestijn, A. Ghandilyan, S. Tsiatsiani, and M.G.M. Aarts. 2008. Expression  
588 differences for genes involved in lignin, glutathione and sulphate metabolism in response  
589 to cadmium in *Arabidopsis thaliana* and the related Zn/Cd-hyperaccumulator *Thlaspi*  
590 *caerulescens*. *Plant Cell Environ.* 31:301–324. doi:10.1111/j.1365-3040.2007.01764.x
- 591 Nachman, M.W., H.E. Hoekstra, and S.L. D’Agostino. 2003. The genetic basis of adaptive  
592 melanism in pocket mice. *PNAS* 100:5268–5273. doi:10.1073/pnas.0431157100
- 593 Nelson, R.M., M.E. Pettersson, X. Li, and Ö. Carlborg. 2013. Variance Heterogeneity in  
594 *Saccharomyces cerevisiae* Expression Data: Trans-Regulation and Epistasis. *PLOS ONE*  
595 8:e79507. doi:10.1371/journal.pone.0079507
- 596 Nordborg, M., and D. Weigel. 2008. Next-generation genetics in plants. *Nature* 456:720–723.  
597 doi:10.1038/nature07629

- 598 Paré, G., N.R. Cook, P.M. Ridker, and D.I. Chasman. 2010. On the Use of Variance per  
599 Genotype as a Tool to Identify Quantitative Trait Interaction Effects: A Report from the  
600 Women’s Genome Health Study. *PLoS Genetics* 6:e1000981.  
601 doi:10.1371/journal.pgen.1000981
- 602 Patterson, N., A.L. Price, and D. Reich. 2006. Population Structure and Eigenanalysis. *PLoS*  
603 *Genet* 2:e190. doi:10.1371/journal.pgen.0020190
- 604 Perry, G.M.L., K.W. Nehrke, D.A. Bushinsky, R. Reid, K.L. Lewandowski, P. Hueber, and S.J.  
605 Scheinman. 2012. Sex Modifies Genetic Effects on Residual Variance in Urinary  
606 Calcium Excretion in Rat ( *Rattus norvegicus* ). *Genetics* 191:1003–1013.  
607 doi:10.1534/genetics.112.138909
- 608 Price, A.L., N.A. Zaitlen, D. Reich, and N. Patterson. 2010. New approaches to population  
609 stratification in genome-wide association studies. *Nat. Rev. Genet.* 11:459–463.  
610 doi:10.1038/nrg2813
- 611 Queitsch, C., T.A. Sangster, and S. Lindquist. 2002. Hsp90 as a capacitor of phenotypic  
612 variation. *Nature* 417:618–624. doi:10.1038/nature749
- 613 R Core Team 2018. R: A language and environment for statistical computing.e. R Foundation for  
614 Statistical Computing, Vienna, Austria.
- 615 Rascio, N., and F. Navari-Izzo. 2011. Heavy metal hyperaccumulating plants: How and why do  
616 they do it? And what makes them so interesting?. *Plant Science* 180:169–181.  
617 doi:10.1016/j.plantsci.2010.08.016



- 618 Rönnegård, L., and Ö. Carlborg. 2007. Separation of base allele and sampling term effects gives  
619 new insights in variance component QTL analysis. *BMC Genetics* 8:1. doi:10.1186/1471-  
620 2156-8-1
- 621 Rönnegård, L., M. Felleki, F. Fikse, H.A. Mulder, and E. Strandberg. 2010a. Genetic  
622 heterogeneity of residual variance - estimation of variance components using double  
623 hierarchical generalized linear models. *Genetics Selection Evolution* 42:8.  
624 doi:10.1186/1297-9686-42-8
- 625 Rönnegård, L., X. Shen, and M. Alam. 2010b. hglm: A Package for Fitting Hierarchical  
626 Generalized Linear Models. *The R Journal* 2:20. doi:10.32614/RJ-2010-009
- 627 Rönnegård, L., and W. Valdar. 2011. Detecting Major Genetic Loci Controlling Phenotypic  
628 Variability in Experimental Crosses. *Genetics* 188:435–447.  
629 doi:10.1534/genetics.111.127068
- 630 Rönnegård, L., and W. Valdar. 2012. Recent developments in statistical methods for detecting  
631 genetic loci affecting phenotypic variability. *BMC Genetics* 13:63. doi:10.1186/1471-  
632 2156-13-63
- 633 Salomé, P.A., K. Bomblies, R.A.E. Laitinen, L. Yant, R. Mott, and D. Weigel. 2011. Genetic  
634 Architecture of Flowering-Time Variation in *Arabidopsis thaliana*. *Genetics* 188:421–  
635 433. doi:10.1534/genetics.111.126607
- 636 Santantonio, N., J.-L. Jannink, and M. Sorrells. 2019. Homeologous Epistasis in Wheat: The  
637 Search for an Immortal Hybrid. *Genetics* 211:1105–1122.  
638 doi:10.1534/genetics.118.301851

- 639 Sell-Kubiak, E., N. Duijvesteijn, M.S. Lopes, L.L.G. Janss, E.F. Knol, P. Bijma, and H.A.  
640 Mulder. 2015. Genome-wide association study reveals novel loci for litter size and its  
641 variability in a Large White pig population. *BMC Genomics* 16:1049.  
642 doi:10.1186/s12864-015-2273-y
- 643 Shen, X., M. Pettersson, L. Rönnegård, and Ö. Carlborg. 2012. Inheritance Beyond Plain  
644 Heritability: Variance-Controlling Genes in *Arabidopsis thaliana*. *PLOS Genetics*  
645 8:e1002839. doi:10.1371/journal.pgen.1002839
- 646 Struchalin, M.V., N. Amin, P.H. Eilers, C.M. van Duijn, and Y.S. Aulchenko. 2012. An R  
647 package “VariABEL” for genome-wide searching of potentially interacting loci by  
648 testing genotypic variance heterogeneity. *BMC Genetics* 13:4. doi:10.1186/1471-2156-  
649 13-4
- 650 Struchalin, M.V., A. Dehghan, J.C. Witteman, C. van Duijn, and Y.S. Aulchenko. 2010.  
651 Variance heterogeneity analysis for detection of potentially interacting genetic loci:  
652 method and its limitations. *BMC Genetics* 11:92. doi:10.1186/1471-2156-11-92
- 653 Sul, J.H., L.S. Martin, and E. Eskin. 2018. Population structure in genetic studies: Confounding  
654 factors and mixed models. *PLoS Genet* 14:e1007309. doi:10.1371/journal.pgen.1007309
- 655 Tan, Q., J.V.B. Hjelmberg, M. Thomassen, A.K. Jensen, L. Christiansen, K. Christensen, J.H.  
656 Zhao, and T.A. Kruse. 2014. Hierarchical linear modeling of longitudinal pedigree data  
657 for genetic association analysis. *BioMed Central*.

- 658 Topless, R.K., T.J. Flynn, M. Cadzow, L.K. Stamp, N. Dalbeth, M.A. Black, and T.R. Merriman.  
659 2015. Association of SLC2A9 genotype with phenotypic variability of serum urate in  
660 pre-menopausal women. *Front. Genet.* 6. doi:10.3389/fgene.2015.00313
- 661 VanRaden, P.M. 2008. Efficient methods to compute genomic predictions. *J. Dairy Sci.*  
662 91:4414–4423. doi:10.3168/jds.2007-0980
- 663 Wang, G., E. Yang, C.L. Brinkmeyer-Langford, and J.J. Cai. 2014a. Additive, Epistatic, and  
664 Environmental Effects Through the Lens of Expression Variability QTL in a Twin  
665 Cohort. *Genetics* 196:413–425. doi:10.1534/genetics.113.157503
- 666 Wang, S., D. Wong, K. Forrest, A. Allen, S. Chao, B.E. Huang, M. Maccaferri, S. Salvi, S.G.  
667 Milner, L. Cattivelli, A.M. Mastrangelo, A. Whan, S. Stephen, G. Barker, R. Wieseke, J.  
668 Plieske, International Wheat Genome Sequencing Consortium, M. Lillemo, D. Mather, R.  
669 Appels, R. Dolferus, G. Brown-Guedira, A. Korol, A.R. Akhunova, C. Feuillet, J. Salse,  
670 M. Morgante, C. Pozniak, M.-C. Luo, J. Dvorak, M. Morell, J. Dubcovsky, M. Ganal, R.  
671 Tuberosa, C. Lawley, I. Mikoulitch, C. Cavanagh, K.J. Edwards, M. Hayden, and E.  
672 Akhunov. 2014b. Characterization of polyploid wheat genomic diversity using a high-  
673 density 90,000 single nucleotide polymorphism array. *Plant Biotechnol. J.* 12:787–796.  
674 doi:10.1111/pbi.12183
- 675 Wang, W., J. Simmonds, Q. Pan, D. Davidson, F. He, A. Battal, A. Akhunova, H.N. Trick, C.  
676 Uauy, and E. Akhunov. 2018. Gene editing and mutagenesis reveal inter-cultivar  
677 differences and additivity in the contribution of TaGW2 homoeologues to grain size and  
678 weight in wheat. *Theor Appl Genet* 131:2463–2475. doi:10.1007/s00122-018-3166-7

- 679 Wei, W.-H., J. Bowes, D. Plant, S. Viatte, A. Yarwood, J. Massey, J. Worthington, and S. Eyre.  
680 2016. Major histocompatibility complex harbors widespread genotypic variability of non-  
681 additive risk of rheumatoid arthritis including epistasis. *Scientific Reports* 6:25014.  
682 doi:10.1038/srep25014
- 683 Wei, W.-H., S. Viatte, T.R. Merriman, A. Barton, and J. Worthington. 2017. Genotypic  
684 variability based association identifies novel non-additive loci DHCR7 and IRF4 in sero-  
685 negative rheumatoid arthritis. *Scientific Reports* 7:5261. doi:10.1038/s41598-017-05447-  
686 1
- 687 Whitt, L., F.K. Ricachenevsky, G. Ziegler, S. Clemens, E. Walker, F. Maathuis, P. Kear, and I.  
688 Baxter. 2018. A curated list of genes that control elemental accumulation in plants.  
689 bioRxiv 456384. doi:10.1101/456384
- 690 Xiao, Y., H. Liu, L. Wu, M. Warburton, and J. Yan. 2017. Genome-wide Association Studies in  
691 Maize: Praise and Stargaze. *Molecular Plant* 10:359–374.  
692 doi:10.1016/j.molp.2016.12.008
- 693 Yang, J., R.J.F. Loos, J.E. Powell, S.E. Medland, E.K. Speliotes, D.I. Chasman, L.M. Rose, G.  
694 Thorleifsson, V. Steinthorsdottir, R. Mägi, L. Waite, A. Vernon Smith, L.M. Yerges-  
695 Armstrong, K.L. Monda, D. Hadley, A. Mahajan, G. Li, K. Kapur, V. Vitart, J.E.  
696 Huffman, S.R. Wang, C. Palmer, T. Esko, K. Fischer, J. Hua Zhao, A. Demirkan, A.  
697 Isaacs, M.F. Feitosa, J. Luan, N.L. Heard-Costa, C. White, A.U. Jackson, M. Preuss, A.  
698 Ziegler, J. Eriksson, Z. Kutalik, F. Frau, I.M. Nolte, J.V. Van Vliet-Ostaptchouk, J.-J.  
699 Hottenga, K.B. Jacobs, N. Verweij, A. Goel, C. Medina-Gomez, K. Estrada, J. Lynn  
700 Bragg-Gresham, S. Sanna, C. Sidore, J. Tyrer, A. Teumer, I. Prokopenko, M. Mangino,

701 C.M. Lindgren, T.L. Assimes, A.R. Shuldiner, J. Hui, J.P. Beilby, W.L. McArdle, P.  
702 Hall, T. Haritunians, L. Zgaga, I. Kolcic, O. Polasek, T. Zemunik, B.A. Oostra, M. Juhani  
703 Junttila, H. Grönberg, S. Schreiber, A. Peters, A.A. Hicks, J. Stephens, N.S. Foad, J.  
704 Laitinen, A. Pouta, M. Kaakinen, G. Willemsen, J.M. Vink, S.H. Wild, G. Navis, F.W.  
705 Asselbergs, G. Homuth, U. John, C. Iribarren, T. Harris, L. Launer, V. Gudnason, J.R.  
706 O’Connell, E. Boerwinkle, G. Cadby, L.J. Palmer, A.L. James, A.W. Musk, E. Ingelsson,  
707 B.M. Psaty, J.S. Beckmann, G. Waeber, P. Vollenweider, C. Hayward, A.F. Wright, I.  
708 Rudan, L.C. Groop, A. Metspalu, K.-T. Khaw, C.M. van Duijn, I.B. Borecki, M.A.  
709 Province, N.J. Wareham, J.-C. Tardif, H.V. Huikuri, L. Adrienne Cupples, L.D. Atwood,  
710 C.S. Fox, M. Boehnke, F.S. Collins, K.L. Mohlke, J. Erdmann, H. Schunkert, C.  
711 Hengstenberg, K. Stark, M. Lorentzon, C. Ohlsson, D. Cusi, J.A. Staessen, M.M. Van der  
712 Klauw, P.P. Pramstaller, S. Kathiresan, J.D. Jolley, S. Ripatti, M.-R. Jarvelin, E.J.C. de  
713 Geus, D.I. Boomsma, B. Penninx, J.F. Wilson, H. Campbell, S.J. Chanock, P. van der  
714 Harst, A. Hamsten, H. Watkins, A. Hofman, J.C. Witteman, M.C. Zillikens, A.G.  
715 Uitterlinden, F. Rivadeneira, M. Carola Zillikens, L.A. Kiemeny, S.H. Vermeulen, G.R.  
716 Abecasis, D. Schlessinger, S. Schipf, M. Stumvoll, A. Tönjes, T.D. Spector, K.E. North,  
717 G. Lettre, M.I. McCarthy, S.I. Berndt, A.C. Heath, P.A.F. Madden, D.R. Nyholt, G.W.  
718 Montgomery, N.G. Martin, B. McKnight, D.P. Strachan, W.G. Hill, H. Snieder, P.M.  
719 Ridker, U. Thorsteinsdottir, K. Stefansson, T.M. Frayling, J.N. Hirschhorn, M.E.  
720 Goddard, and P.M. Visscher. 2012. *FTO* genotype is associated with phenotypic  
721 variability of body mass index. *Nature* 490:267–272. doi:10.1038/nature11401

- 722 Young, A.I., F.L. Wauthier, and P. Donnelly. 2018. Identifying loci affecting trait variability and  
723 detecting interactions in genome-wide association studies. *Nature Genetics* 50:1608.  
724 doi:10.1038/s41588-018-0225-6
- 725 Yu, J., L. Wu, L. Fu, Q. Shen, L. Kuang, D. Wu, and G. Zhang. 2019. Genotypic difference of  
726 cadmium tolerance and the associated microRNAs in wild and cultivated barley. *Plant*  
727 *Growth Regul* 87:389–401. doi:10.1007/s10725-019-00479-1
- 728 Zheng, X., D. Levine, J. Shen, S.M. Gogarten, C. Laurie, and B.S. Weir. 2012. A high-  
729 performance computing toolset for relatedness and principal component analysis of SNP  
730 data. *Bioinformatics* 28:3326–3328. doi:10.1093/bioinformatics/bts606
- 731

732 **Figures**

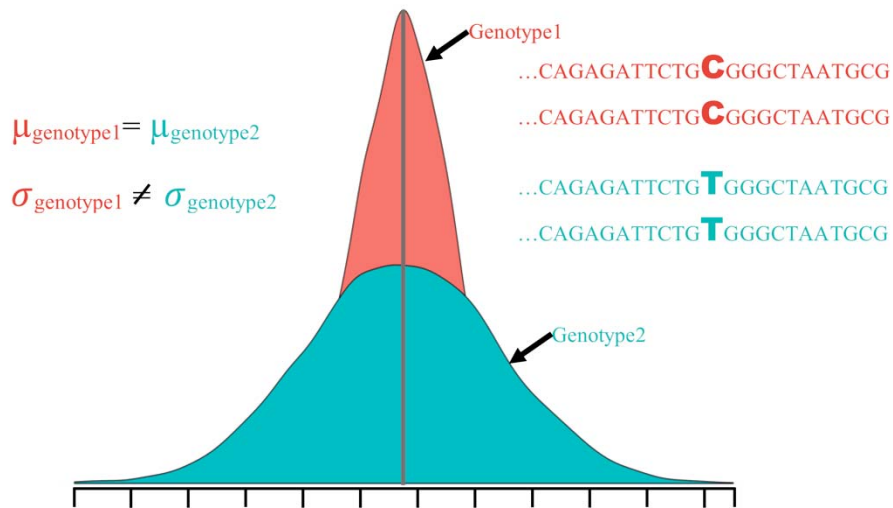

734 Figure 1. Illustration of variance heterogeneity of two genotype groups at a biallelic locus  
735 affecting the variance not the mean. Genotypes with CC allelic combination present narrow  
736 variance, whereas genotypes with TT allelic combination show greater variability. The mean  
737 difference between two genotype groups is the same as shown by the solid vertical gray line.

738

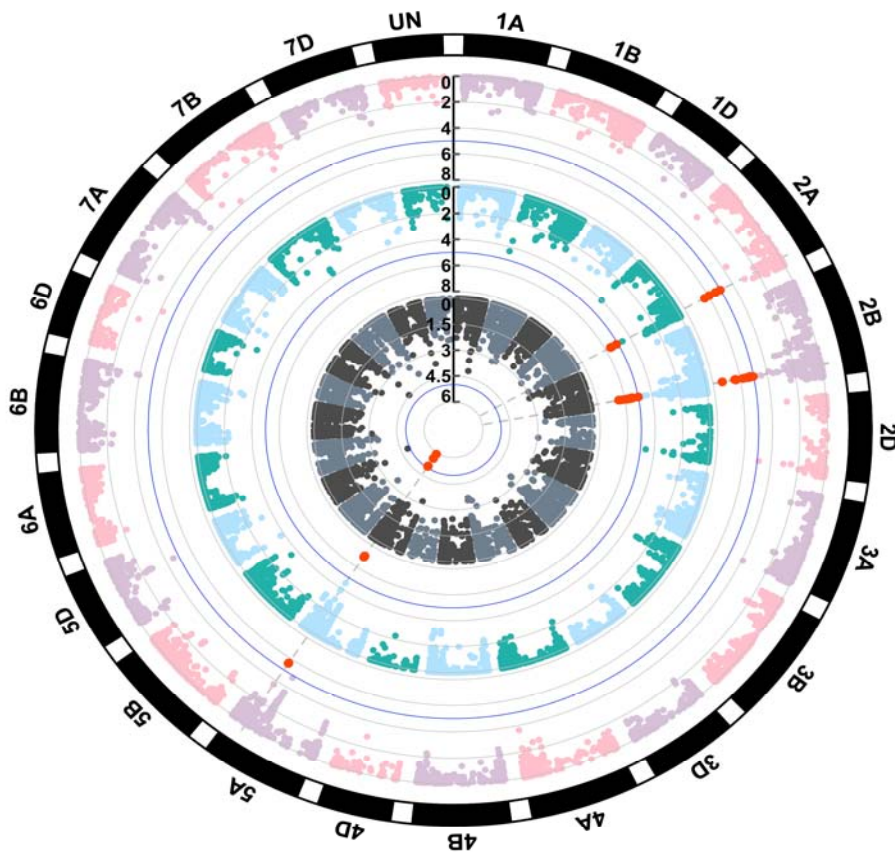

739

740 Figure 2: Circular Manhattan plot of standard genome-wide association studies (GWAS) based  
741 on mean differences (inner), and variance GWAS using double generalized linear model  
742 (middle) and hierarchical generalized linear model (outer) for grain cadmium concentration in  
743 the hard-red winter wheat association panel. The red dots represent the significant markers  
744 associated with either mean or variance heterogeneity quantitative trait loci. The blue line in each  
745 circular plot shows the cutoff for the statistical significance. The P-values in  $-\log_{10}$  scale are  
746 given in black vertical line.

747



748

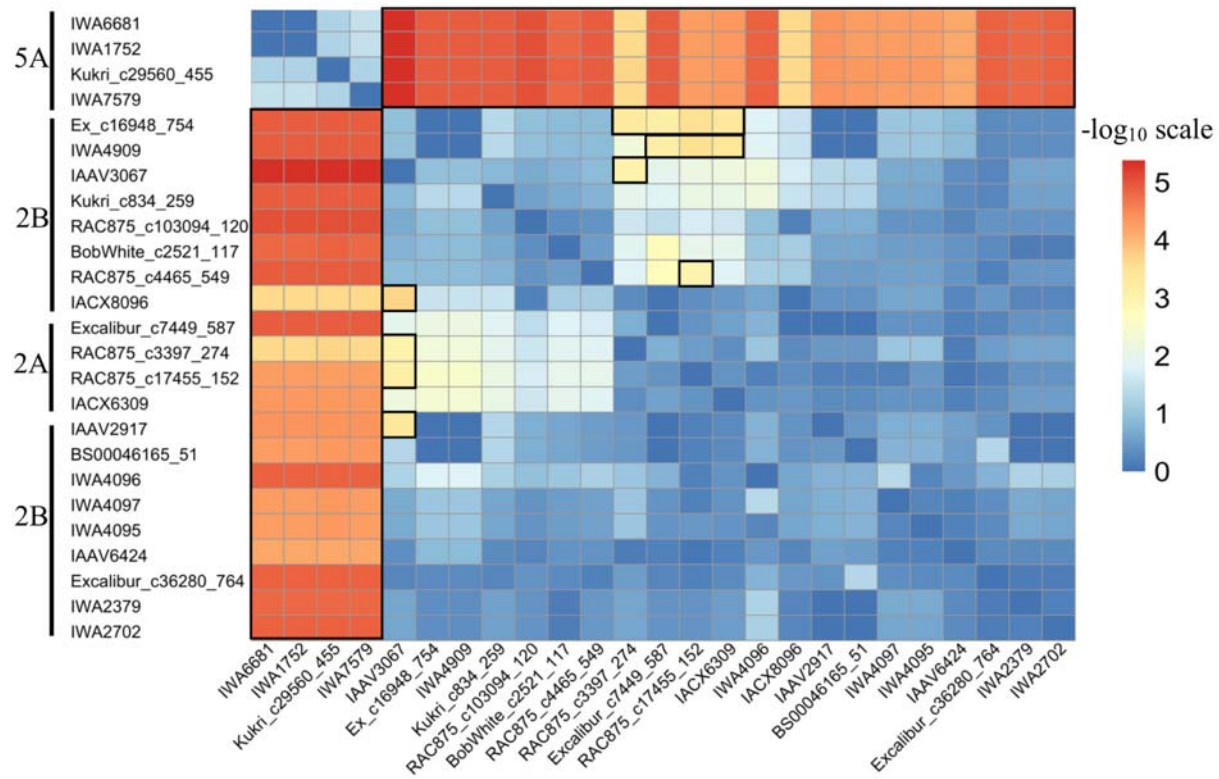

749

750 Figure 3: Heat map showing all possible pairwise epistatic interactions between the markers  
751 associated with vQTL on chromosomes 2A and 2B or mvQTL on chromosome 5A.  
752 Chromosome information of each marker is given on the left side. The heat map is sorted and  
753 color coded based on  $-\log_{10}$  (p-value) scale with the legend given on right side. Interactions that  
754 are significant ( $-\log_{10} > 3.8$ ) are color coded as red or orange in color and outlined in black box.

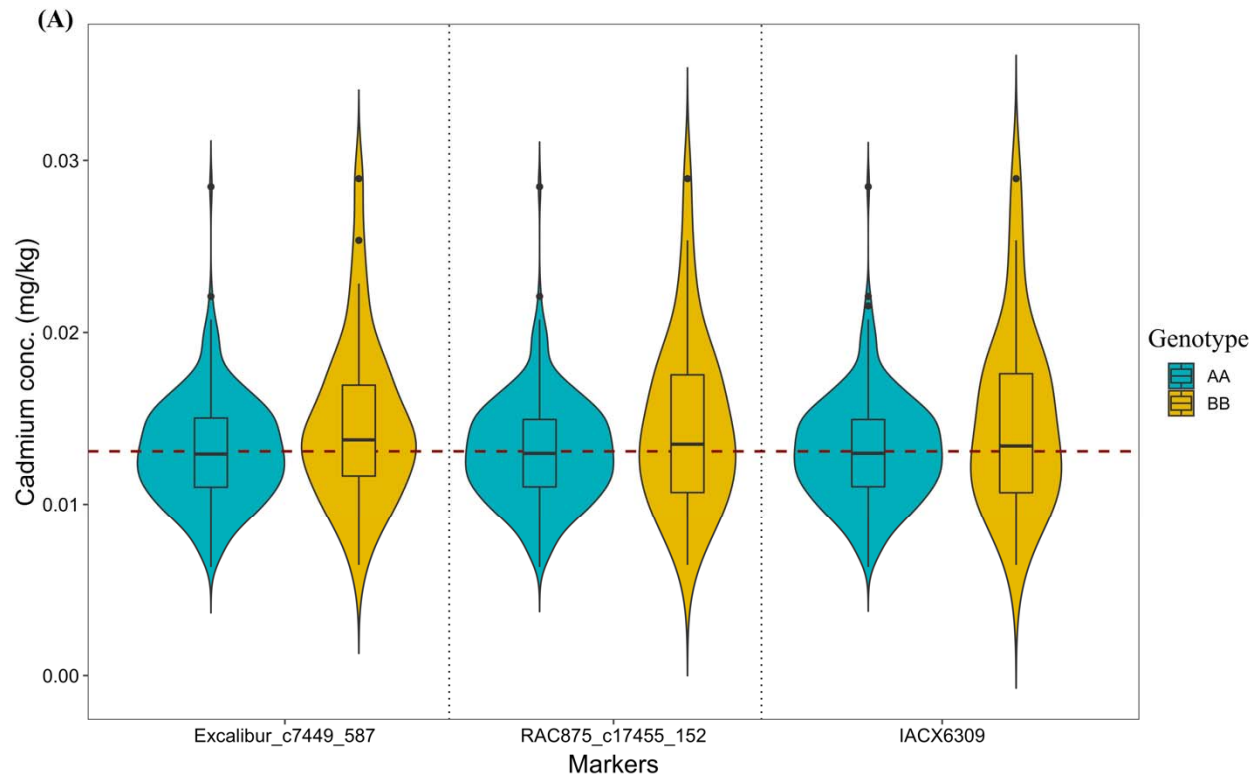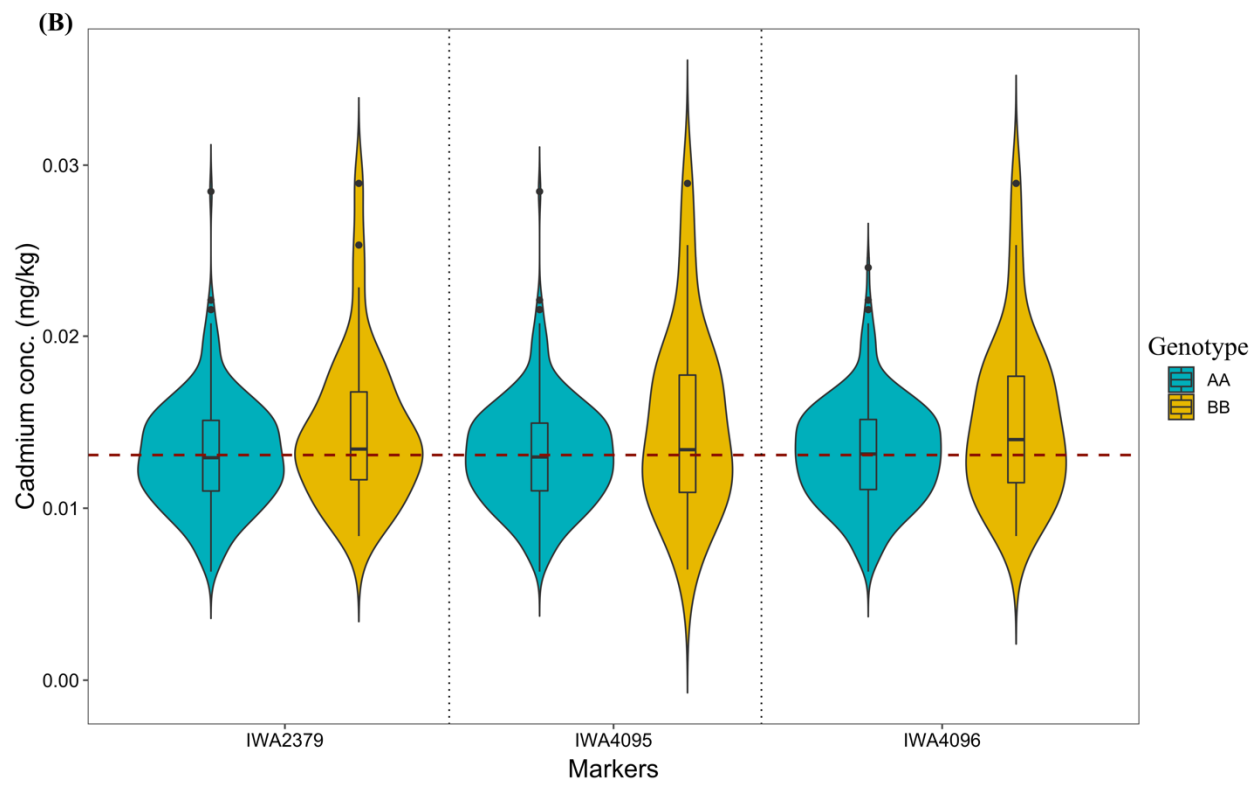

755

756 Figure 4: Violin plot showing the differences in the mean and variance of grain cadmium  
757 concentration with alternative marker genotype groups coded as AA and BB for the top three  
758 significant markers associated with vQTL on (A) chromosome 2A and (B) chromosome 2B. The  
759 mean of marker genotypes AA and BB are connected by red dotted line.

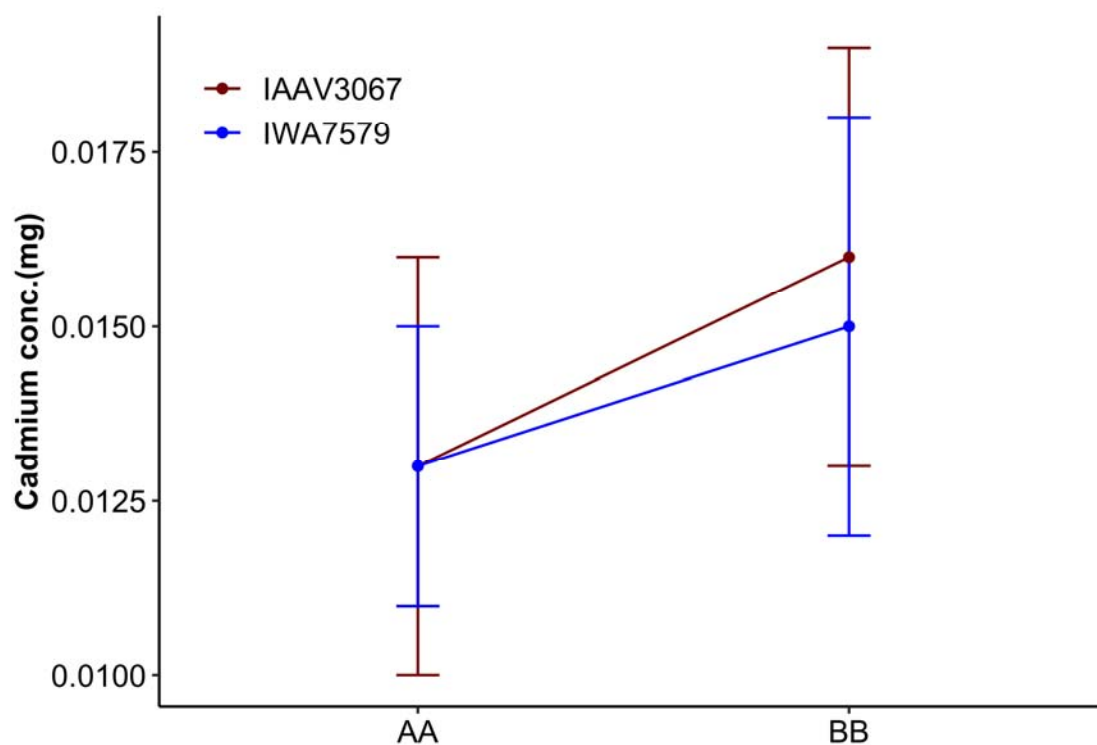

760  
761 Figure 5: Epistatic interaction plot between marker pair IAAV3067 (shown in dark-red color)  
762 and IWA7579 (shown in blue color) on chromosomes 5A (mvQTL) and 2B (vQTL). The y-axis  
763 shows the phenotypic value of cadmium concentration (mg). AA and BB represent the alternate  
764 genotypes at the particular marker. Plotted points indicate two-locus genotype means  $\pm$  standard  
765 deviations for the two loci represented by error bars. Large difference in the mean value of  
766 cadmium concentrations at BB genotype compared to no difference in the mean value of

767 cadmium concentrations at AA genotype indicates the presence of interaction between the two  
768 markers.
